# Supplementary material
Source: PubMed Central journal article supplement (PMC7833309)

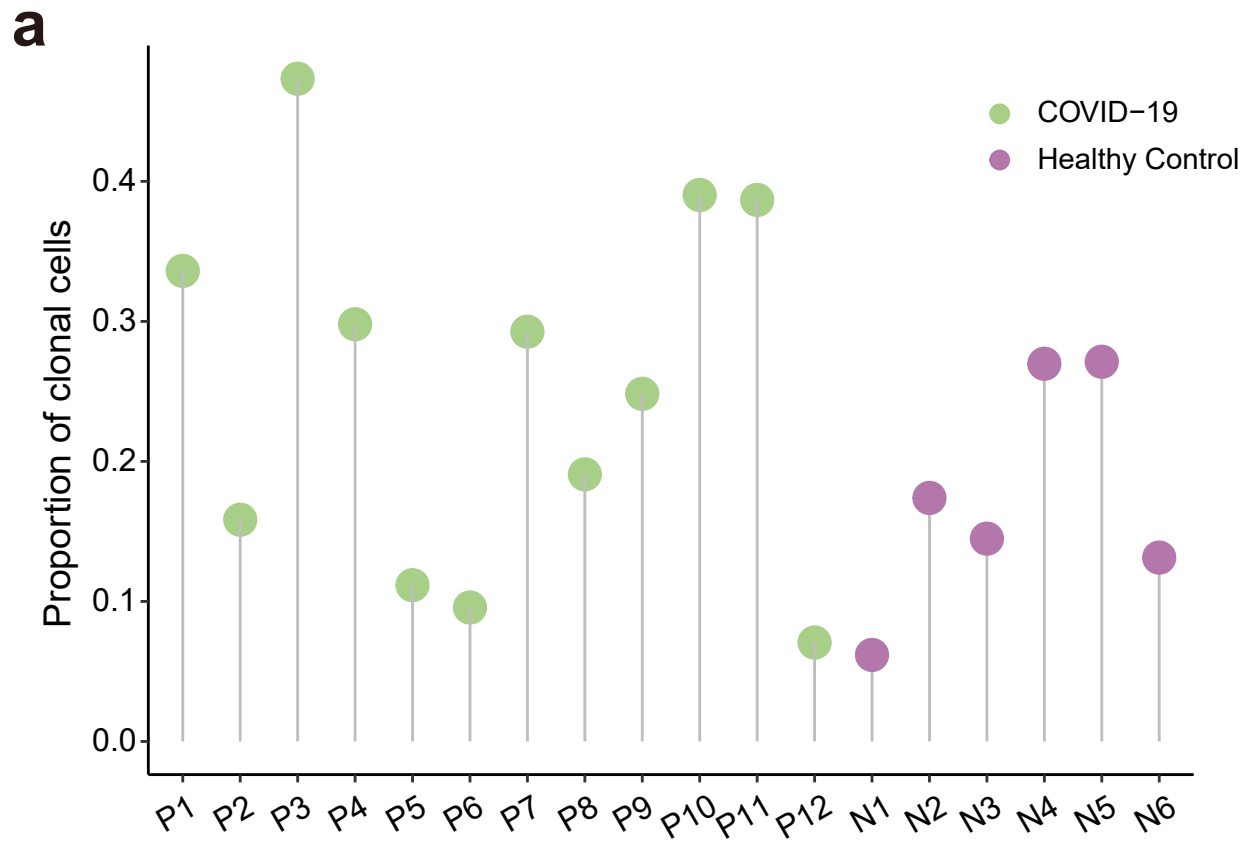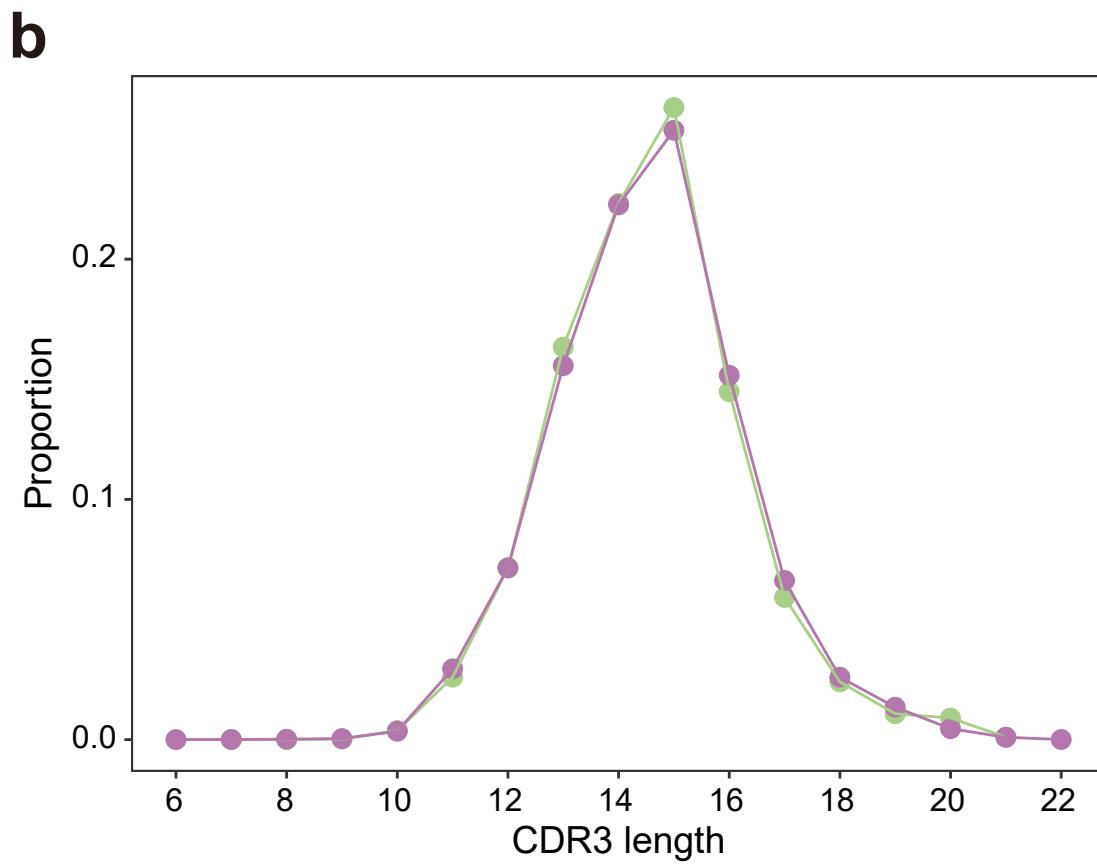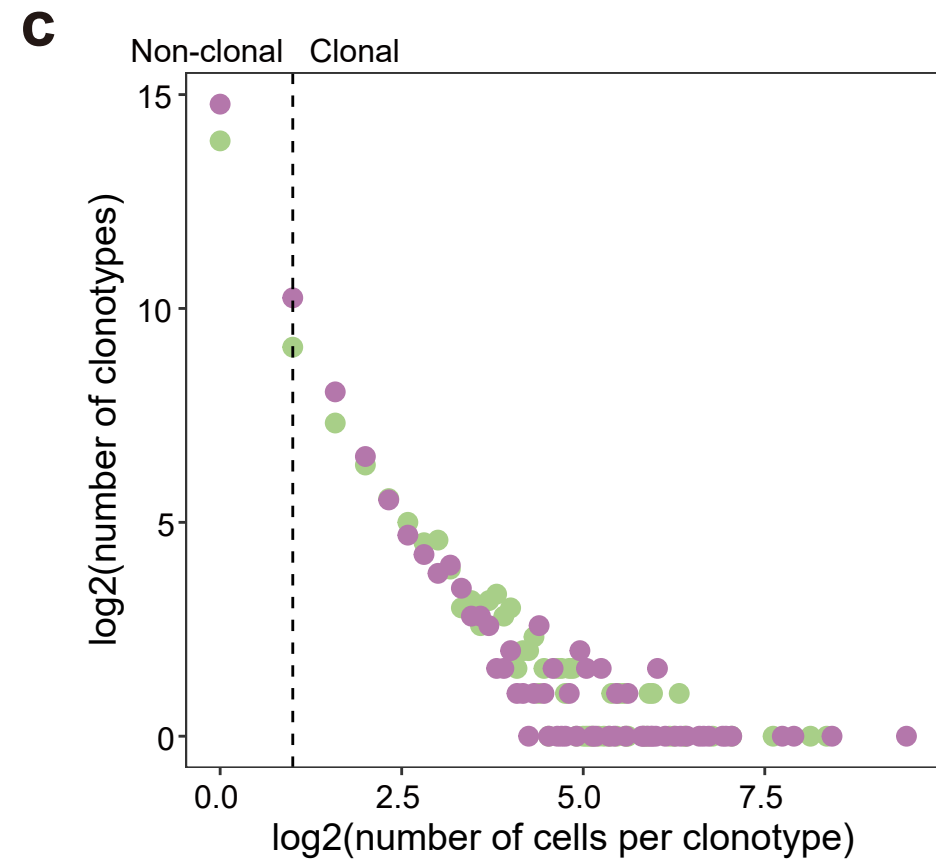

Supplement: mmc5.pdf [file mmc5.pdf]
